# Supplementary material for: Fibulin-2 Is a Driver of Malignant Progression in Lung Adenocarcinoma
Source: PubMed Central journal article supplement (PMC3677922; doi:10.1371/journal.pone.0067054), 2013-06-10
Supplement: pone.0067054.s001.pdf [file pone.0067054.s001.pdf]

**Table S1. RT-PCR primer sequences**

| <b>gene</b>           | <b>forward (5'→3')</b>  | <b>reverse (5'→3')</b> |
|-----------------------|-------------------------|------------------------|
| Real-time PCR primers |                         |                        |
| <i>Fbln2</i>          | CGCAGCTCAACACAGAGCACCG  | CTGTGCAATCCTGCCACGGGAC |
| <i>L32</i>            | AACAGGGTGCGGAGAAGGT     | TGCTCCCATAACCGATGTTG   |
| <i>Itga1</i>          | TGGCTTCTCACCGTTATCCTA   | CACACAAGGCATTGATCTCTCT |
| <i>Itga2</i>          | TGTCTGGCGTATAATGTTGGC   | CTTGTGGGTTCGTAAGCTGCT  |
| <i>Itga10</i>         | CACCAGAGGCCGAATTTGGAT   | CCCCAACATGCTGTAAGACAC  |
| <i>Itgb1</i>          | CTACTTCTGCACGATGTGATGAT | TTGGCTGGCAACCCTTCTTT   |
| <i>Loxl1</i>          | AGGTGCCCGACAACCTGGAGAG  | CAAGGCCGTCGGAAGGTT     |
| <i>Loxl2</i>          | GCCCTCCGATGTGGTCAAG     | CCCTCCTTCACCTCCACGTAG  |
| <i>Loxl3</i>          | GGAACAGTCTGTGACCGAAAGTG | CACTCAAGTGGATGGCACCCAT |
| <i>Loxl4</i>          | TTCTCGGCTGGCGTTGCTTGTA  | GGACTTGGAGAGGCAGTTTTCC |
| RT-PCR primers        |                         |                        |
| <i>Fbln2</i>          | CAGCCCAACACCTGCAAAG     | GACATAGCCTGGCTCACAG    |
| <i>L32</i>            | GGACCAAGAAGTTCATCAGG    | TCTTAGAGGACACATTGTGAG  |
